# Supplementary material for: The Application of Mobile fNIRS in Marketing Research—Detecting the “First-Choice-Brand” Effect
Source: PubMed Central journal article supplement (PMC6222120; doi:10.3389/fnhum.2018.00433), 2018-11-01
Supplement: Data_Sheet_1.pdf [file Data_Sheet_1.pdf]

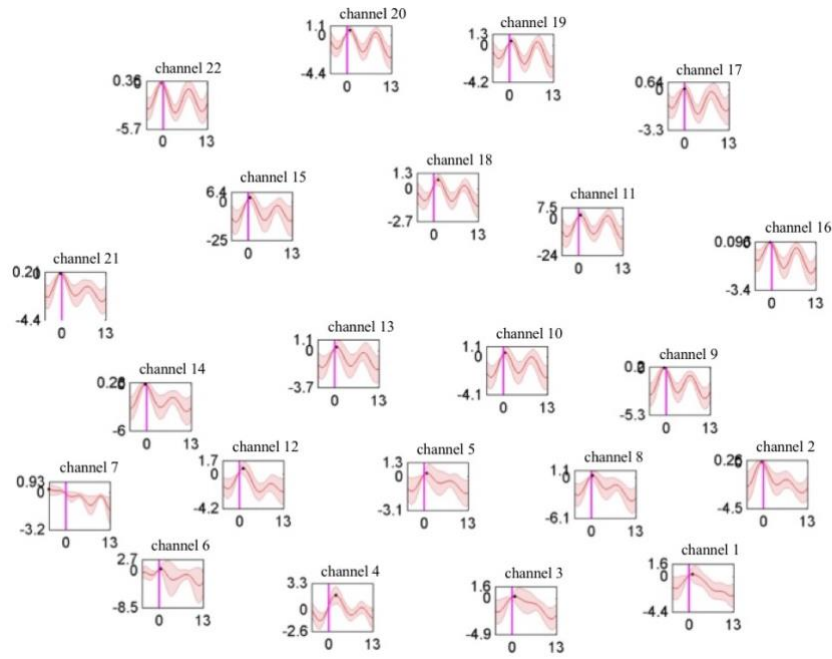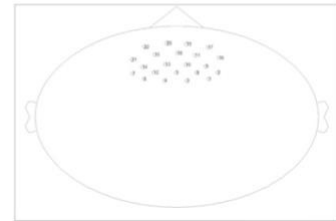

Appendix 1.1 – Representation of the oxygenated haemoglobin concentrations of target decisions (TD) and the standard deviation of every 22 channels respectively in the block integrating 80% TD-trails in the target brand group.

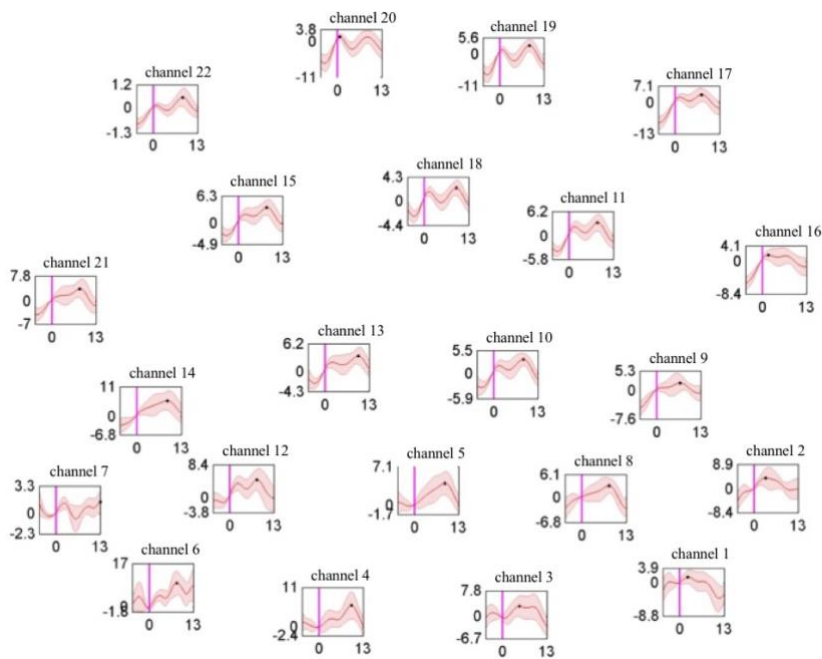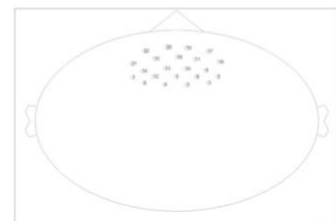

Appendix 1.2 – Representation of the oxygenated haemoglobin concentrations of target decisions (TD) and the standard deviation of every 22 channels respectively in the block integrating 20% TD-trails in the target brand group.

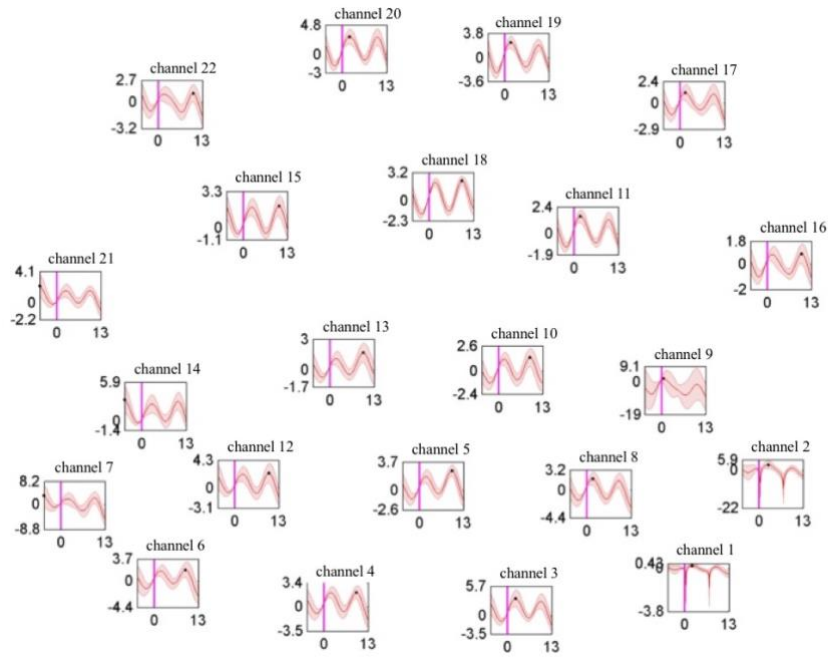

Appendix 1.3 – Representation of the oxygenated haemoglobin concentrations of target decisions (TD) and the standard deviation of every 22 channels respectively in the block integrating 80% TD-trails in the non-target brand group.

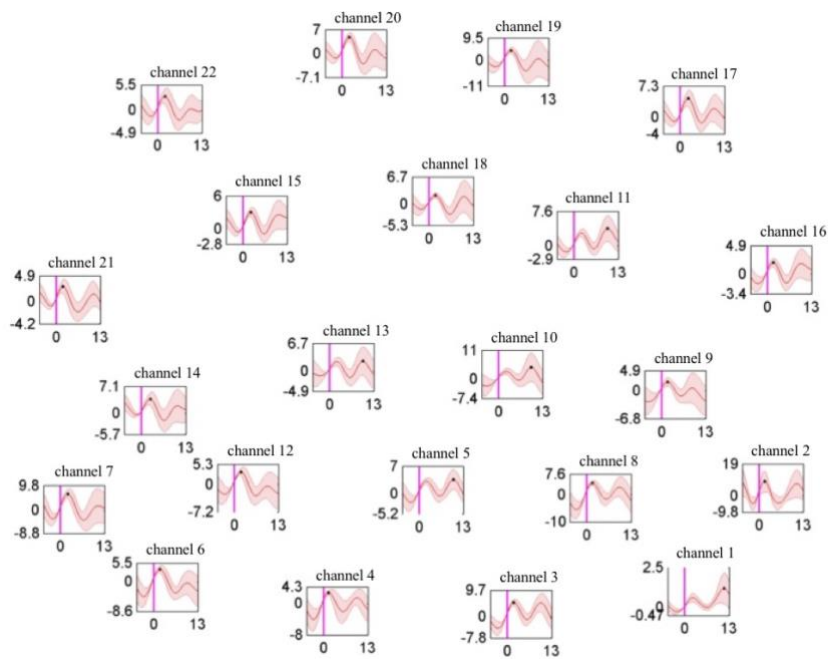

Appendix 1.4 – Representation of the oxygenated haemoglobin concentrations of target decisions (TD) and the standard deviation of every 22 channels respectively in the block integrating 20% TD-trails in the non-target brand group.
